# Supplementary material
Source: publisher figshare collection journal article supplement (https://frontiersin.figshare.com/ndownloader/files/11301317)
Supplement: Supplementary file [file 11301317]

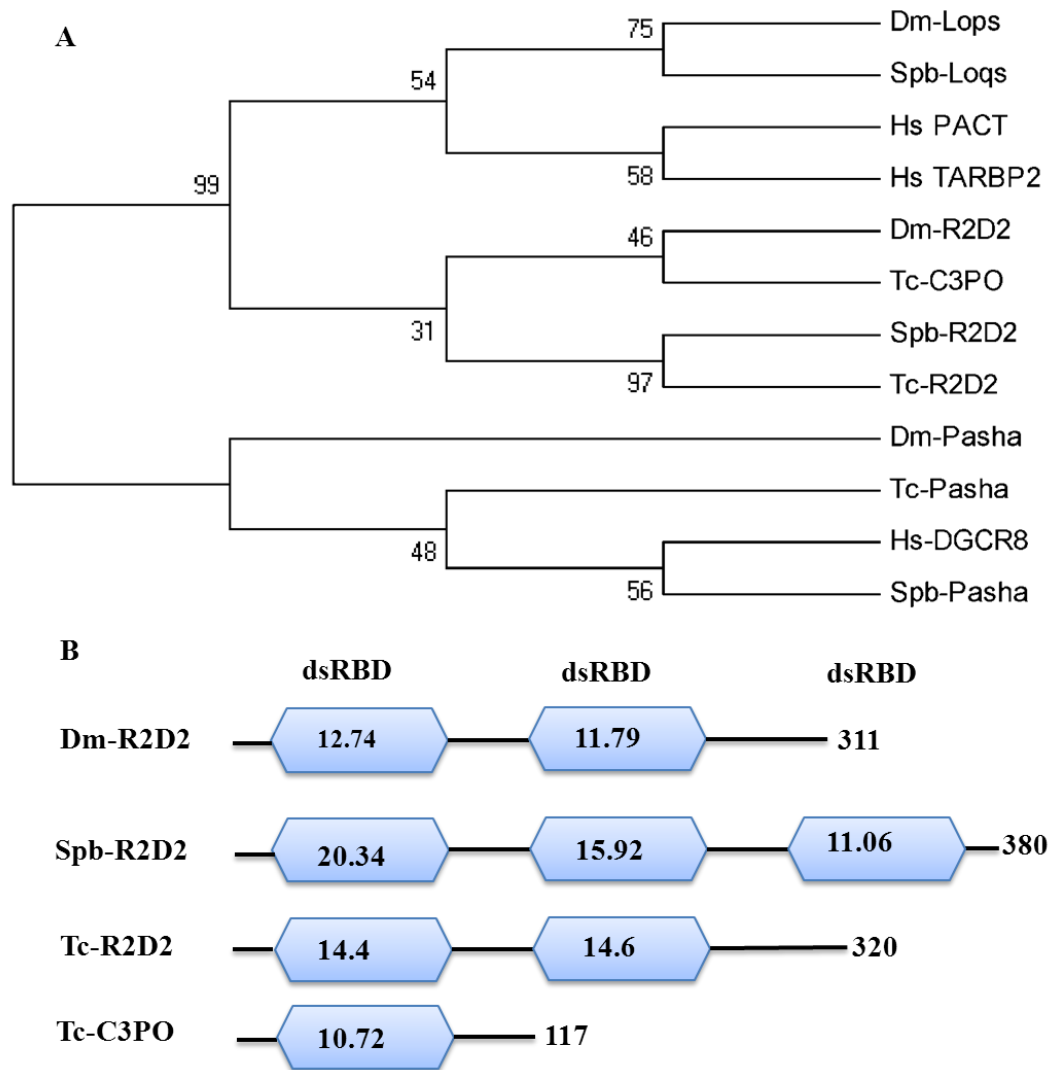

**Figure S1** Phylogenetic and domain architecture analysis of dsRNA binding proteins

(A) Neighbor-joining inferred phylogeny of insect Dicer proteins, including DmLops (NP\_723813), SpbLops (c71406), HsPACT (NP\_003681), HsTARBP2 (NP\_599150), DmR2D2 (NP\_609152), TcR2D2 (NP\_001128425), TcC3PO (ABX72055), SpbR2D2 (c19500), DmPasha (NP\_723813), DmPasha (NP\_651879), TcPasha (XP\_971282), HsDGCR8 (AF165527), SpbR2D2 (c79402). Bootstrap values (1000 replicates) are shown next to the branches. (B) Domain architecture of dsRNA binding proteins (R2D2), dsRNA-binding domain are indicated. Bm, *Bombyx mori*; Dm, *Drosophila melanogaster*; Tc, *Tribolium castaneum*; Hs, *Homo sapiens*;

Spb, soybean pod borer.
